# Supplementary material for: A cobalt(ii) coordination polymer-derived catalyst engineered via temperature-induced semi-reversible single-crystal-to-single-crystal (SCSC) dehydration for efficient liquid-phase epoxidation of olefins
Source: Royal Society of Chemistry journal article supplement (doi:10.1039/d4dt00739e), 2024-01-01
Supplement: d4dt00739e1.pdf [file d4dt00739e1.pdf]

## Dalton Transactions

### Supplementary Information

**A cobalt(II) coordination polymer-derived catalyst engineered *via* temperature-induced semi-reversible single-crystal-to-single-crystal (SCSC) dehydration for efficient liquid-phase epoxidation of olefins**

# A cobalt(II) coordination polymer-derived catalyst engineered *via* temperature-induced semi-reversible single-crystal-to-single-crystal (SCSC) dehydration for efficient liquid-phase epoxidation of olefins

Siya T. Hulushe,<sup>a\*</sup> Gareth M. Watkins,<sup>a</sup> Setshaba D. Khanye<sup>b</sup>

<sup>a</sup> Department of Chemistry, Rhodes University, Makhanda 6139, South Africa

<sup>b</sup> Division of Pharmaceutical Chemistry, Faculty of Pharmacy, Rhodes University, Makhanda 6139, South Africa

\*Correspondence should be directed to: [hulushesiya@gmail.com](mailto:hulushesiya@gmail.com)

## Table of Contents

|                                                                                                                                                                                                 |     |
|-------------------------------------------------------------------------------------------------------------------------------------------------------------------------------------------------|-----|
| <b>Table S1</b> Selected bond lengths [Å] and angles [°] for compound <b>1</b> .....                                                                                                            | S3  |
| <b>Table S1</b> Continued.....                                                                                                                                                                  | S4  |
| <b>Table S2</b> Selected bond lengths [Å] and angles [°] for compound <b>1'</b> .....                                                                                                           | S4  |
| <b>Table S2</b> Continued.....                                                                                                                                                                  | S5  |
| <b>Table S3</b> Selected bond lengths [Å] and angles [°] for compound <b>2</b> .....                                                                                                            | S5  |
| <b>Table S4</b> List of hydrogen bond interactions for compounds <b>1</b> , <b>1'</b> and <b>2</b> . ....                                                                                       | S6  |
| <b>Table S5</b> Selected geometry parameters for Cg(I)–Cg(J), Y–X···Cg(J) intermolecular interactions along with all the associated angles in compounds <b>1</b> , <b>1'</b> and <b>2</b> ..... | S7  |
| <b>Table S5</b> Continued.....                                                                                                                                                                  | S8  |
| <b>Scheme S1</b> Hydrothermal synthesis of compound <b>1</b> with 63% yield. ....                                                                                                               | S9  |
| <b>Fig. S1 (a)</b> Ortep view and atom numbering scheme with displacement ellipsoids drawn at 50% probability level for compound <b>1</b> .....                                                 | S9  |
| <b>Fig. S1 (b)</b> Repeating structural motifs showing dimers consisting of two edge-sharing symmetry-related cobaltous ions in compound <b>1'</b> . ....                                       | S9  |
| <b>Fig. S1 (c)</b> A depiction illustrating a six-coordinated Co1 octahedron surrounded by carboxylate oxygen atoms and water molecules in compound <b>2</b> .....                              | S10 |
| <b>Fig. S2 (a)</b> A 1D intersecting channel system illustrating a narrow open window with approx. 11.5 Å × 11.3 Å dimensions in the polymeric structure of network <b>1</b> .....              | S10 |
| <b>Fig. S2 (b)</b> A 3D supramolecular framework of <b>1</b> showing extensive O–H···O hydrogen bond interactions primarily generated by water molecules. ....                                  | S11 |
| <b>Fig. S2 (c)</b> A 3D supramolecular network of <b>2</b> displaying O–H···O hydrogen bond interactions mainly manifested by water molecules. ....                                             | S11 |
| <b>Fig. S3</b> Infrared (IR) spectra for compounds <b>1</b> , <b>1'</b> and <b>2</b> . ....                                                                                                     | S12 |

|                                                                                                                                                                                                 |     |
|-------------------------------------------------------------------------------------------------------------------------------------------------------------------------------------------------|-----|
| <b>Fig. S4</b> Single-cycle heat-cool differential scanning calorimetry (DSC) profile for <b>1</b> (step 1: onset dehydration is 109.3 °C and, step 2: onset phase transition is 142.4 °C)..... | S12 |
| <b>Fig. S5 (a)</b> Thermogravimetric (tg; blue thermogram) plot and its derivative (dtg; red curve) for compound <b>1</b> .....                                                                 | S13 |
| <b>Fig. S5 (b)</b> Thermogravimetric (tg; blue thermogram) plot and its derivative (dtg; red curve) for compound <b>1'</b> .....                                                                | S13 |
| <b>Fig. S5 (c)</b> Thermogravimetric (tg; blue thermogram) plot and its derivative (dtg; red curve) for compound <b>2</b> .....                                                                 | S14 |
| <b>Fig. S6</b> Infrared spectra of catalyst <b>2</b> after the first (blue), second (red), third (green), and fourth (purple) recycled runs.....                                                | S14 |
| <b>Fig. S7 (a)</b> GC-MS spectrum for the selective oxidation of cyclohexene to cyclohexene epoxide utilizing O <sub>2</sub> over catalyst <b>2</b> for 20 h. ....                              | S15 |
| <b>Fig. S7 (b)</b> GC-MS spectrum for the selective oxidation of 3-methylcyclohexene to 3-methylcyclohexene epoxide utilizing O <sub>2</sub> over catalyst <b>2</b> for 20 h. ....              | S15 |
| <b>Fig. S7 (c)</b> GC-MS spectrum for the selective oxidation of cyclopentene to cyclopentene epoxide utilizing O <sub>2</sub> over catalyst <b>2</b> for 20 h. ....                            | S16 |
| <b>Fig. S7 (d)</b> GC-MS spectrum for the selective oxidation of 3-methylcyclopentene to 3-methylcyclopentene epoxide utilizing O <sub>2</sub> over catalyst <b>2</b> for 20 h. ....            | S16 |
| <b>Fig. S7 (e)</b> GC-MS spectrum for the selective oxidation of limonene to limonene-1,2-epoxide utilizing O <sub>2</sub> over catalyst <b>2</b> for 20 h. ....                                | S17 |
| <b>Fig. S7 (f)</b> GC-MS spectrum for the selective oxidation of styrene to styrene epoxide utilizing O <sub>2</sub> over catalyst <b>2</b> for 20 h.....                                       | S17 |
| <b>Fig. S7 (g)</b> GC-MS spectrum for the selective oxidation of <i>trans</i> -stilbene to <i>trans</i> -stilbene epoxide utilizing O <sub>2</sub> over catalyst <b>2</b> for 20 h. ....        | S18 |
| <b>Fig. S8 (a)</b> <sup>1</sup> H NMR spectra (in CDCl <sub>3</sub> ) for cyclohexene epoxide. ....                                                                                             | S19 |
| <b>Fig. S8 (b)</b> <sup>1</sup> H NMR spectra (in CDCl <sub>3</sub> ) for 3-methylcyclohexene epoxide.....                                                                                      | S19 |
| <b>Fig. S8 (c)</b> <sup>1</sup> H NMR spectra (in CDCl <sub>3</sub> ) for cyclopentene epoxide. ....                                                                                            | S20 |
| <b>Fig. S8 (d)</b> <sup>1</sup> H NMR spectra (in CDCl <sub>3</sub> ) for 3-methylcyclopentene epoxide.....                                                                                     | S20 |
| <b>Fig. S8 (e)</b> <sup>1</sup> H NMR spectra (in CDCl <sub>3</sub> ) for limonene-1,2-epoxide. ....                                                                                            | S21 |
| <b>Fig. S8 (f)</b> <sup>1</sup> H NMR spectra (in CDCl <sub>3</sub> ) for styrene epoxide.....                                                                                                  | S21 |
| <b>Fig. S8 (g)</b> <sup>1</sup> H NMR spectra (in CDCl <sub>3</sub> ) for <i>trans</i> -stilbene epoxide.....                                                                                   | S22 |

**Table S1** Selected bond lengths [Å] and angles [°] for compound **1**.

| Bond Length                             |           |                                            |           |                       |          |
|-----------------------------------------|-----------|--------------------------------------------|-----------|-----------------------|----------|
| Residue: 1                              |           |                                            |           |                       |          |
| Co1–O1                                  | 2.107(3)  | Co1–O10W <sup>i</sup>                      | 2.085(3)  | O3–C5                 | 1.251(5) |
| Co1–O1 <sup>i</sup>                     | 2.107(3)  | Co2–O11W                                   | 2.029(3)  | O4–C5                 | 1.264(4) |
| Co2–O4 <sup>ii</sup>                    | 2.104(3)  | Co2–O11W <sup>ii</sup>                     | 2.029(3)  | C1–C2                 | 1.499(6) |
| Co2–O4 <sup>ii</sup>                    | 2.104(3)  | Co2–O12W                                   | 2.128(3)  | C2–C3                 | 1.391(5) |
| Co1–O9W                                 | 2.066(4)  | Co2–O12W <sup>ii</sup>                     | 2.128(3)  | C2–C4 <sup>v</sup>    | 1.401(5) |
| Co1–O9W <sup>ii</sup>                   | 2.066(4)  | O1–C1                                      | 1.272(4)  | C3–C4                 | 1.387(6) |
| Co1–O10W                                | 2.085(3)  | O2–C1                                      | 1.253(5)  | C4–C5                 | 1.512(5) |
| Residue: 2                              |           |                                            |           |                       |          |
| Co3–O5                                  | 2.123(3)  | Co3–O14W <sup>iii</sup>                    | 2.096(3)  | O7–C10                | 1.246(6) |
| Co3–O5 <sup>iii</sup>                   | 2.123(3)  | Co4–O15W                                   | 2.100(3)  | O8–C10                | 1.278(4) |
| Co4–O8                                  | 2.085(3)  | Co4–O15W <sup>iv</sup>                     | 2.100(3)  | C6–C7                 | 1.509(5) |
| Co4–O8 <sup>iv</sup>                    | 2.085(3)  | Co4–O16W                                   | 2.080(4)  | C7–C8                 | 1.379(6) |
| Co3–O13W                                | 2.055(4)  | Co4–O16W <sup>iv</sup>                     | 2.080(4)  | C7–C9 <sup>vi</sup>   | 1.401(4) |
| Co3–O13W <sup>iii</sup>                 | 2.055(4)  | O5–C6                                      | 1.265(4)  | C8–C9                 | 1.390(5) |
| Co3–O14W                                | 2.096(3)  | O6–C6                                      | 1.250(5)  | C9–C10                | 1.505(6) |
| Bond Angle                              |           |                                            |           |                       |          |
| Residue: 1                              |           |                                            |           |                       |          |
| O1–Co1–O9W                              | 89.22(13) | O4–Co2–O4 <sup>ii</sup>                    | 180.00    | O2–C1–C2              | 118.5(3) |
| O1–Co1–O10W                             | 86.11(12) | O4–Co2–O11W <sup>ii</sup>                  | 92.23(12) | C1–C2–C3              | 118.3(3) |
| O1–Co1–O1 <sup>i</sup>                  | 180.00    | O4–Co2–O12W <sup>ii</sup>                  | 87.17(12) | C1–C2–C4 <sup>v</sup> | 122.7(3) |
| O1–Co1–O9W <sup>i</sup>                 | 90.78(13) | O11W–Co2–O12W                              | 86.80(14) | C3–C2–C4 <sup>v</sup> | 118.8(4) |
| O1–Co1–O10W <sup>i</sup>                | 93.89(12) | O11W–Co2–O4 <sup>ii</sup>                  | 92.23(12) | C2–C3–C4              | 121.9(3) |
| O9W–Co1–O10W                            | 93.53(14) | O11W–Co2–O11W <sup>ii</sup>                | 180.00    | C3–C4–C5              | 117.8(3) |
| O9W–Co1–O1 <sup>i</sup>                 | 90.78(13) | O11W–Co2–O12W <sup>ii</sup>                | 93.20(14) | C3–C4–C2 <sup>v</sup> | 119.4(3) |
| O9W–Co1–O9W <sup>i</sup>                | 180.00    | O12W–Co2–O4 <sup>ii</sup>                  | 87.17(12) | C5–C4–C2 <sup>v</sup> | 122.8(4) |
| O9W–Co1–O10W <sup>i</sup>               | 86.48(14) | O12W–Co2–O11W <sup>ii</sup>                | 93.20(14) | O3–C5–O4              | 125.1(3) |
| O10W–Co1–O1 <sup>i</sup>                | 93.89(12) | O12W–Co2–O12W <sup>ii</sup>                | 180.00    | O3–C5–C4              | 117.5(3) |
| O10W–Co1–O9W <sup>i</sup>               | 86.48(14) | O4 <sup>ii</sup> –Co2–O11W <sup>ii</sup>   | 87.78(12) | O4–C5–C4              | 117.4(3) |
| O10W–Co1–O10W <sup>i</sup>              | 180.00    | O4 <sup>ii</sup> –Co2–O12W <sup>ii</sup>   | 92.83(12) | Co1–O9W–H9WA          | 104(5)   |
| O1 <sup>i</sup> –Co1–O9W <sup>i</sup>   | 89.22(13) | O11W <sup>ii</sup> –Co2–O12W <sup>ii</sup> | 86.80(14) | Co1–O9W–H9WB          | 136(3)   |
| O1 <sup>i</sup> –Co1–O10W <sup>i</sup>  | 86.11(12) | Co1–O1–C1                                  | 130.4(3)  | Co1–O10W–H10WA        | 118(3)   |
| O9W <sup>i</sup> –Co1–O10W <sup>i</sup> | 93.53(14) | Co2–O4–C5                                  | 126.8(3)  | Co1–O10W–H10WB        | 121(4)   |
| O4–Co2–O11W                             | 87.78(12) | O1–C1–O2                                   | 124.6(4)  | Co2–O11W–H11WA        | 107(4)   |
| O4–Co2–O12W                             | 92.83(12) | O1–C1–C2                                   | 116.8(4)  | Co2–O11W–H11WB        | 127(5)   |

Table S1 Continued...

| Bond Angle                                   |           |                                            |           |                         |          |
|----------------------------------------------|-----------|--------------------------------------------|-----------|-------------------------|----------|
| Residue: 1                                   |           |                                            |           |                         |          |
| Co2–O12W–H12WA                               | 104(5)    | Co2–O12W–H12WB                             | 122(3)    | C2–C3–H3                | 120(3)   |
| C4–C3–H3                                     | 118(3)    | H9WA–O9–H9WB                               | 108(6)    | H10WA–O10W–H10WB        | 107(6)   |
| H11WA–O11W–H11WB                             | 103(6)    | H12WA–O12W–H12WB                           | 111(5)    |                         |          |
| Residue: 2                                   |           |                                            |           |                         |          |
| O5–Co3–O13W                                  | 87.31(13) | O15W–Co4–O16W                              | 87.05(14) | C8–C9–C7 <sup>vi</sup>  | 118.3(4) |
| O5–Co3–O14W                                  | 90.69(12) | O15W–Co4–O8W <sup>iv</sup>                 | 91.50(12) | C10–C9–C7 <sup>vi</sup> | 123.7(3) |
| O5–Co3–O5 <sup>iii</sup>                     | 180.00    | O15W–Co4–O15W <sup>iv</sup>                | 180.00    | O7–C10–O8               | 124.2(4) |
| O5–Co3–O13W <sup>iii</sup>                   | 92.69(13) | O15W–Co4–O16W <sup>iv</sup>                | 92.95(14) | O7–C10–C9               | 119.6(3) |
| O5–Co3–O14W <sup>iii</sup>                   | 89.31(12) | O16W–Co4–O8 <sup>iv</sup>                  | 89.95(13) | O8–C10–C9               | 116.1(4) |
| O13W–Co3–O14W                                | 92.68(14) | O16W–Co4–O15W <sup>iv</sup>                | 92.95(14) | Co3–O13W–H13WA          | 133(3)   |
| O13W–Co3–O5 <sup>iii</sup>                   | 92.69(13) | O16W–Co4–O16W <sup>iv</sup>                | 180.00    | Co3–O13W–H13WB          | 117(5)   |
| O13W–Co3–O13W <sup>iii</sup>                 | 180.00    | O8 <sup>iv</sup> –Co4–O15W <sup>iv</sup>   | 88.50(12) | Co3–O14W–H14WA          | 119(4)   |
| O13W–Co3–O14W <sup>iii</sup>                 | 87.32(14) | O8 <sup>iv</sup> –Co4–O16W <sup>iv</sup>   | 90.05(13) | Co3–O14W–H14WB          | 103(4)   |
| O14W–Co3–O5 <sup>iii</sup>                   | 89.31(12) | O15W <sup>iv</sup> –Co4–O16W <sup>iv</sup> | 87.05(14) | Co4–O15W–H15WA          | 116(3)   |
| O14W–Co3–O13W <sup>iii</sup>                 | 87.32(14) | Co3–O5–C6                                  | 122.6(3)  | Co4–O15W–H15WB          | 112(3)   |
| O14W–Co3–O14W <sup>iii</sup>                 | 180.00    | Co4–O8–C10                                 | 131.3(3)  | Co4–O16W–H16WA          | 101(5)   |
| O5 <sup>iii</sup> –Co3–O13W <sup>iii</sup>   | 87.31(13) | O5–C6–O6                                   | 125.2(3)  | Co4–O16W–H16WB          | 130(3)   |
| O5 <sup>iii</sup> –Co3–O14W <sup>iii</sup>   | 90.69(12) | O5–C6–C7                                   | 117.9(4)  | C7–C8–H8                | 121(4)   |
| O13W <sup>iii</sup> –Co3–O14W <sup>iii</sup> | 92.68(14) | O6–C6–C7                                   | 116.9(3)  | C9–C8–H8                | 116(4)   |
| O8–Co4–O15W                                  | 88.50(12) | C6–C7–C8                                   | 117.3(3)  | H13WA–O13W–H13BW        | 106(6)   |
| O8–Co4–O16W                                  | 90.05(13) | C6–C7–C9 <sup>vi</sup>                     | 123.3(3)  | H14WA–O14W–H14WB        | 99(6)    |
| O8–Co4–O8 <sup>iv</sup>                      | 180.00    | C8–C7–C9 <sup>vi</sup>                     | 119.4(3)  | H15WA–O15W–H15WB        | 109(5)   |
| O8–Co4–O15W <sup>iv</sup>                    | 91.50(12) | C7–C8–C9                                   | 122.3(3)  | H16WA–O16W–H16WB        | 106(6)   |
| O8–Co4–O16W <sup>iv</sup>                    | 89.95(13) | C8–C9–C10                                  | 118.0(3)  |                         |          |

**Symmetry codes:** (i) 1–x, 2–y, 1–z; (ii) 2–x, 1–y, 2–z; (iii) 1–x, 1–y, 2–z; (iv) –x, 2–y, 1–z; (v) 2–x, 1–y, 1–z; (vi) 1–x, 1–y, 1–z.

Table S2 Selected bond lengths [Å] and angles [°] for compound 1'.

| Bond Length              |           |                                         |            |                                         |            |
|--------------------------|-----------|-----------------------------------------|------------|-----------------------------------------|------------|
| Co1–O1                   | 2.024(3)  | Co1–O2 <sup>iv</sup>                    | 2.079(3)   | C1–C2                                   | 1.509(5)   |
| Co1–O2 <sup>ii</sup>     | 2.194(3)  | Co1–O2 <sup>v</sup>                     | 2.079(3)   | C2–C3                                   | 1.388(5)   |
| Co1–O2 <sup>iii</sup>    | 2.194(3)  | O1–C1                                   | 1.244(5)   | C2–C2 <sup>vii</sup>                    | 1.389(7)   |
| Co1–O1 <sup>i</sup>      | 2.024(3)  | O2–C1                                   | 1.278(5)   | C3–H3                                   | 0.95       |
| Bond Angle               |           |                                         |            |                                         |            |
| O1–Co1–O2 <sup>ii</sup>  | 87.61(12) | O2 <sup>iii</sup> –Co1–O1 <sup>i</sup>  | 87.61(12)  | Co1 <sup>vi</sup> –O2–Co1 <sup>iv</sup> | 103.59(12) |
| O1–Co1–O2 <sup>iii</sup> | 86.33(12) | O2 <sup>iii</sup> –Co1–O2 <sup>iv</sup> | 110.89(12) | O1–C1–O2                                | 123.3(4)   |

**Table S2** Continued...

|                                         |            |                                        |            |                          |          |
|-----------------------------------------|------------|----------------------------------------|------------|--------------------------|----------|
| O1–Co1–O1 <sup>i</sup>                  | 98.09(12)  | O2 <sup>iii</sup> –Co1–O2 <sup>v</sup> | 76.42(12)  | O1–C1–C2                 | 116.2(3) |
| O1–Co1–O2 <sup>iv</sup>                 | 93.11(12)  | O1 <sup>i</sup> –Co1–O2 <sup>iv</sup>  | 159.00(12) | O2–C1–C2                 | 120.4(4) |
| O1–Co1–O2 <sup>v</sup>                  | 159.00(12) | O1 <sup>i</sup> –Co1–O2 <sup>v</sup>   | 93.11(12)  | C1–C2–C3                 | 115.7(4) |
| O2 <sup>ii</sup> –Co1–O2 <sup>iii</sup> | 170.74(11) | O2 <sup>iv</sup> –Co1–O2 <sup>v</sup>  | 82.21(12)  | C1–C2–C2 <sup>vii</sup>  | 125.7(3) |
| O2 <sup>ii</sup> –Co1–O1 <sup>i</sup>   | 86.33(12)  | Co1–O1–C1                              | 127.9(3)   | C3–C2–C2 <sup>vii</sup>  | 118.6(4) |
| O2 <sup>ii</sup> –Co1–O2 <sup>iv</sup>  | 76.42(12)  | C1–O2–Co1 <sup>vi</sup>                | 124.5(3)   | C2–C3–C2 <sup>viii</sup> | 122.9(5) |
| O2 <sup>ii</sup> –Co1–O2 <sup>v</sup>   | 110.89(12) | C1–O2–Co1 <sup>iv</sup>                | 129.2(3)   | C2–C3–H3                 | 119.0    |

**Symmetry codes:** (i) 1–x, y, 2–z; (ii) x, y, 1+z; (iii) 1–x, y, 1–z; (iv) 1/2–x, 3/2–y, 1–z; (v) 1/2+x, 3/2–y, 1+z; (vi) x, y, –1+z; (vii) –x, y, –z; (viii) x, 1–y, z.

**Table S3** Selected bond lengths [Å] and angles [°] for compound 2.

| Bond Length                             |          |                                             |           |                                         |           |
|-----------------------------------------|----------|---------------------------------------------|-----------|-----------------------------------------|-----------|
| Co1–O1 <sup>i</sup>                     | 1.991(6) | Co2–O5W                                     | 2.087(8)  | O3–C5                                   | 1.221(9)  |
| Co1–O4 <sup>ii</sup>                    | 2.082(6) | Co2–O2 <sup>vi</sup>                        | 2.088(5)  | O4–C5                                   | 1.304(11) |
| Co1–O4 <sup>iii</sup>                   | 2.172(6) | Co2–O2 <sup>vii</sup>                       | 2.088(5)  | C1–C2                                   | 1.512(11) |
| Co1–O4 <sup>iv</sup>                    | 2.172(6) | Co2–O2 <sup>viii</sup>                      | 2.184(5)  | C2–C3                                   | 1.393(13) |
| Co1–O1                                  | 1.991(6) | Co2–O5W <sup>viii</sup>                     | 2.087(8)  | C2–C4 <sup>v</sup>                      | 1.409(11) |
| Co1–O4 <sup>v</sup>                     | 2.082(6) | O1–C1                                       | 1.248(10) | C3–C4                                   | 1.388(12) |
| Co2–O2                                  | 2.184(5) | O2–C1                                       | 1.280(9)  | C4–C5                                   | 1.504(12) |
| Bond Angle                              |          |                                             |           |                                         |           |
| O1–Co1–O4 <sup>ii</sup>                 | 93.5(2)  | O2–Co2–O2 <sup>viii</sup>                   | 180.00    | Co1 <sup>x</sup> –O4–Co1 <sup>xii</sup> | 104.2(3)  |
| O1–Co1–O4 <sup>iii</sup>                | 87.1(2)  | O2–Co2–O5W <sup>viii</sup>                  | 91.3(3)   | O1–C1–O2                                | 121.8(7)  |
| O1–Co1–O4 <sup>iv</sup>                 | 92.9(2)  | O5W–Co2–O2 <sup>vi</sup>                    | 92.4(3)   | O1–C1–C2                                | 122.0(7)  |
| O1–Co1–O1 <sup>i</sup>                  | 180.00   | O5W–Co2–O2 <sup>vii</sup>                   | 87.6(3)   | O2–C1–C2                                | 115.8(7)  |
| O1–Co1–O4 <sup>v</sup>                  | 86.5(2)  | O5W–Co2–O2 <sup>viii</sup>                  | 91.3(3)   | C1–C2–C3                                | 114.6(7)  |
| O4 <sup>ii</sup> –Co1–O4 <sup>v</sup>   | 104.2(2) | O5W–Co2–O5W <sup>viii</sup>                 | 180.00    | C1–C2–C4 <sup>v</sup>                   | 126.8(8)  |
| O4 <sup>ii</sup> –Co1–O4 <sup>iv</sup>  | 75.8(2)  | O2 <sup>vi</sup> –Co2–O2 <sup>vii</sup>     | 180.0(3)  | C3–C2–C4 <sup>v</sup>                   | 118.6(8)  |
| O4 <sup>ii</sup> –Co1–O1 <sup>i</sup>   | 86.5(2)  | O2 <sup>vi</sup> –Co2–O2 <sup>viii</sup>    | 76.4(2)   | C2–C3–C4                                | 123.6(8)  |
| O4 <sup>ii</sup> –Co1–O4 <sup>v</sup>   | 180.0(3) | O2 <sup>vi</sup> –Co2–O5W <sup>viii</sup>   | 87.6(3)   | C3–C4–C5                                | 114.6(7)  |
| O4 <sup>iii</sup> –Co1–O4 <sup>iv</sup> | 180.0(3) | O2 <sup>vii</sup> –Co2–O2 <sup>viii</sup>   | 103.6(2)  | C3–C4–C2 <sup>v</sup>                   | 117.8(8)  |
| O4 <sup>iii</sup> –Co1–O1 <sup>i</sup>  | 92.9(2)  | O2 <sup>vii</sup> –Co2–O5W <sup>viii</sup>  | 92.4(3)   | C5–C4–C2 <sup>v</sup>                   | 127.6(7)  |
| O4 <sup>iii</sup> –Co1–O4 <sup>v</sup>  | 75.8(2)  | O2 <sup>viii</sup> –Co2–O5W <sup>viii</sup> | 88.7(3)   | O3–C5–O4                                | 122.7(8)  |
| O4 <sup>iv</sup> –Co1–O1 <sup>i</sup>   | 87.1(2)  | Co1–O1–C1                                   | 144.0(5)  | O3–C5–C4                                | 119.2(8)  |
| O4 <sup>iv</sup> –Co1–O4 <sup>v</sup>   | 104.2(2) | Co2–O2–C1                                   | 131.5(5)  | O4–C5–C4                                | 118.1(7)  |
| O1 <sup>i</sup> –Co1–O4 <sup>v</sup>    | 93.5(2)  | Co2–O2–Co2 <sup>ix</sup>                    | 103.6(2)  | Co2–O5W–H5WA                            | 99(8)     |
| O2–Co2–O5W                              | 88.7(3)  | C1–O2–Co2 <sup>ix</sup>                     | 120.1(5)  | Co2–O5W–H5WB                            | 129(8)    |
| O2–Co2–O2 <sup>vi</sup>                 | 103.6(2) | C5–O4–Co1 <sup>x</sup>                      | 134.4(5)  | C2–C3–H3                                | 119(5)    |
| O2–Co2–O2 <sup>vii</sup>                | 76.4(2)  | C5–O4–Co1 <sup>xii</sup>                    | 113.0(5)  | C4–C3–H3                                | 117(5)    |

**Symmetry codes:** (i) –x, 2–y, 1–z; (ii) –1+x, 1+y, z; (iii) x, 1+y, z; (iv) –x, 1–y, 1–z; (v) 1–x, 1–y, 1–z; (vi) 1+x, y, z; (vii) –x, 1–y, –z; (viii) 1–x, 1–y, –z; (ix) –1+x, y, z; (x) x, –1+y, z; (xi) 1+x, –1+y, z.

**Table S4** List of hydrogen bond interactions for compounds **1**, **1'** and **2**.

| CP       | D–H···A          | <i>d</i> (D–H) /Å                  | <i>d</i> (H···A) /Å | <i>d</i> (D–A) /Å | ∠(D–H···A) /° | Symmetry      |              |
|----------|------------------|------------------------------------|---------------------|-------------------|---------------|---------------|--------------|
| <b>1</b> | O1W–H1WB···O2W   | 0.97(7)                            | 1.79(7)             | 2.749(7)          | 170(4)        | x, y, z       |              |
|          | O1W–H1WA···O2W   | 0.70(4)                            | 2.07(4)             | 2.773(5)          | 178(8)        | 1–x, 2–y, 2–z |              |
|          | O2W–H2WB···O15W  | 0.72(5)                            | 2.20(6)             | 2.903(5)          | 163(7)        | x, y, z       |              |
|          | O2W–H2WA···O14W  | 0.79(7)                            | 2.05(7)             | 2.800(6)          | 160(6)        | –x, 2–y, 2–z  |              |
|          | O4W–H4WB···O12W  | 0.78(8)                            | 2.04(7)             | 2.776(5)          | 159(8)        | x, y, z       |              |
|          | O3W–H3WA···O4W   | 0.71(5)                            | 2.13(5)             | 2.773(5)          | 152(5)        | –1+x, y, z    |              |
|          | O3W–H3WB···O10W  | 0.85(9)                            | 2.11(9)             | 2.935(7)          | 164(6)        | –1+x, y, z    |              |
|          | O3W–H3WB···O9W   | 0.85(9)                            | 2.58(6)             | 2.987(5)          | 111(6)        | –x, 2–y, 1–z  |              |
|          | O4W–H4WA···O3W   | 0.74(11)                           | 2.01(10)            | 2.747(5)          | 179(19)       | –x, 2–y, 2–z  |              |
|          | O9W–H9WA···O1    | 0.85(7)                            | 2.59(9)             | 2.931(6)          | 105(6)        |               |              |
|          | O9W–H9WA···O2    | 0.85(7)                            | 1.82(7)             | 2.645(4)          | 163(8)        |               |              |
|          | O9W–H9WB···O8    | 0.88(7)                            | 1.85(7)             | 2.718(6)          | 170(4)        | x, y, z       |              |
|          | O10W–H10WA···O6  | 0.80(5)                            | 1.93(5)             | 2.689(4)          | 160(4)        | x, y, z       |              |
|          | O10W–H10WB···O1W | 0.84(7)                            | 1.85(7)             | 2.688(5)          | 174(5)        | x, y, z       |              |
|          | O11W–H11WA···O3  | 0.82(5)                            | 1.88(5)             | 2.644(4)          | 155(5)        | 2–x, 1–y, 2–z |              |
|          | O11W–H11WB···O1W | 0.68(5)                            | 2.09(5)             | 2.750(4)          | 163(8)        | 1+x, –1+y, z  |              |
|          | O12W–H12WA···O2  | 0.76(6)                            | 1.95(5)             | 2.697(4)          | 173(7)        | x, y, 1+z     |              |
|          | O12W–H12WB···O5  | 0.89(6)                            | 1.91(6)             | 2.793(5)          | 171(5)        | 1–x, 1–y, 2–z |              |
|          | O13W–H13WA···O4  | 0.82(6)                            | 1.95(6)             | 2.772(5)          | 175(4)        | x, y, z       |              |
|          | O13W–H13WB···O7  | 0.74(5)                            | 2.01(5)             | 2.732(4)          | 166(7)        | 1–x, 1–y, 1–z |              |
|          | O14W–H14WA···O4W | 0.83(8)                            | 1.87(8)             | 2.696(7)          | 173(4)        | x, y, z       |              |
|          | O14W–H14WB···O6  | 0.79(5)                            | 1.85(6)             | 2.595(4)          | 157(6)        |               |              |
|          | O15W–H15WA···O3W | 0.84(6)                            | 1.90(6)             | 2.710(7)          | 161(4)        | x, y, z       |              |
|          | O15W–H15WB···O3  | 0.79(5)                            | 1.94(5)             | 2.702(4)          | 164(4)        | –1+x, y, z    |              |
|          | O16W–H16WA···O7  | 0.84(5)                            | 1.84(6)             | 2.663(4)          | 166(7)        | –x, 2–y, 1–z  |              |
|          | O16W–H16WA···O8  | 0.84(5)                            | 2.57(7)             | 2.944(6)          | 108(5)        | –x, 2–y, 1–z  |              |
|          | O16W–H16WB···O1  | 0.86(7)                            | 1.90(7)             | 2.744(6)          | 170(3)        | 1–x, 2–y, 1–z |              |
|          |                  | C8–H8···O8                         | 0.94(5)             | 2.46(6)           | 2.795(5)      | 101(4)        |              |
|          | <b>1'</b>        | <b>No classical hydrogen bonds</b> |                     |                   |               |               |              |
|          | <b>2</b>         | O5W–H5WA···O1                      | 1.05(13)            | 2.27(13)          | 3.026(9)      | 128(9)        | 1+x, y, z    |
|          |                  | O5W–H5WB···O3                      | 0.78(11)            | 2.21(11)          | 2.942(10)     | 151(10)       | 1–x, 1–y, –z |
|          |                  | O5W–H5WA···O4                      | 1.05(13)            | 2.51(13)          | 3.463(9)      | 151(10)       | x, 1+y, z    |
|          |                  | C3–H3···O2                         | 0.89(7)             | 2.32(8)           | 2.671(11)     | 103(6)        |              |

**Table S5** Selected geometry parameters for Cg(I)–Cg(J), Y–X···Cg(J) intermolecular interactions along with all the associated angles in compounds **1**, **1'** and **2**.<sup>a</sup>

| Cg(I)–Cg(J)        | Cg–Cg (Å)  | $\alpha$ (°) | $\beta$ (°) | $\gamma$ (°) | CgI_Perp (Å) | CgJ_Perp (Å) | Symmetry        |
|--------------------|------------|--------------|-------------|--------------|--------------|--------------|-----------------|
| <b>compound 1</b>  |            |              |             |              |              |              |                 |
| Cg(1)···Cg(2)      | 5.398(3)   | 4.2(2)       | 43.7        | 42.5         | 3.9784(18)   | -3.9030(17)  | x, y, z         |
| Cg(1)···Cg(2)      | 5.399(3)   | 4.2(2)       | 43.7        | 42.5         | -3.9785(18)  | 3.9030(17)   | 1+x, y, z       |
| Cg(1)···Cg(2)      | 5.398(3)   | 4.2(2)       | 43.7        | 42.5         | -3.9784(18)  | -3.9030(17)  | 1-x, 1-y, 1-z   |
| Cg(1)···Cg(2)      | 5.399(3)   | 4.2(2)       | 43.7        | 42.5         | 3.9785(18)   | 3.9030(17)   | 2-x, 1-y, 1-z   |
| Cg(2)···Cg(1)      | 5.399(3)   | 4.2(2)       | 42.5        | 43.7         | 3.9033(17)   | -3.9784(18)  | -1+x, y, z      |
| Cg(2)···Cg(1)      | 5.398(3)   | 4.2(2)       | 42.5        | 43.7         | -3.9027(17)  | 3.9784(18)   | x, y, z         |
| Cg(2)···Cg(1)      | 5.399(3)   | 4.2(2)       | 42.5        | 43.7         | -3.9033(17)  | -3.9784(18)  | 1-x, 1-y, 1-z   |
| Cg(2)···Cg(1)      | 5.398(3)   | 4.2(2)       | 42.5        | 43.7         | 3.9027(17)   | 3.9784(18)   | 2-x, 1-y, 1-z   |
| <b>compound 1'</b> |            |              |             |              |              |              |                 |
| Cg(1)···Cg(1)      | 4.548(3)   | 0.0(3)       | 44.8        | 44.8         | -3.228(2)    | 3.228(2)     | x, y, -1+z      |
| Cg(1)···Cg(1)      | 4.548(3)   | 0.0(3)       | 44.8        | 44.8         | 3.228(2)     | -3.228(2)    | x, y, 1+z       |
| Cg(1)···Cg(1)      | 4.548(3)   | 0.0(3)       | 44.8        | 44.8         | 3.228(2)     | 3.228(2)     | -x, y, -1-z     |
| Cg(1)···Cg(1)      | 4.548(3)   | 0.0(3)       | 44.8        | 44.8         | -3.228(2)    | -3.228(2)    | -x, y, 1-z      |
| Cg(1)···Cg(1)      | 4.548(3)   | 0.0(3)       | 44.8        | 44.8         | 3.228(2)     | 3.228(2)     | -x, 1-y, -1-z   |
| Cg(1)···Cg(1)      | 4.548(3)   | 0.0(3)       | 44.8        | 44.8         | -3.228(2)    | -3.228(2)    | -x, 1-y, 1-z    |
| Cg(1)···Cg(1)      | 4.548(3)   | 0.0(3)       | 44.8        | 44.8         | -3.228(2)    | 3.228(2)     | x, 1-y, -1+z    |
| Cg(1)···Cg(1)      | 4.548(3)   | 0.0(3)       | 44.8        | 44.8         | 3.228(2)     | -3.228(2)    | x, 1-y, 1+z     |
| <b>compound 2</b>  |            |              |             |              |              |              |                 |
| Cg(1)···Cg(3)      | 4.9849(9)  | 34.8(3)      | 18.7        | 52.6         | 3.030(2)     | -4.721(2)    | -1+x, y, z      |
| Cg(1)···Cg(3)      | 5.6657(10) | 34.8(3)      | 33.6        | 57.7         | -3.030(2)    | 4.721(2)     | -1+x, 1+y, 1+z  |
| Cg(1)···Cg(4)      | 4.9849(9)  | 34.8(3)      | 18.7        | 52.6         | 3.030(2)     | -4.721(2)    | -2+x, y, z      |
| Cg(1)···Cg(4)      | 5.6657(10) | 34.8(3)      | 33.6        | 57.7         | -3.030(2)    | 4.721(2)     | -2+x, 1+y, 1+z  |
| Cg(1)···Cg(5)      | 5.799(4)   | 82.4(3)      | 54.9        | 70.6         | -1.930(2)    | -3.332(4)    | x, y, z         |
| Cg(1)···Cg(5)      | 5.431(4)   | 82.4(3)      | 52.2        | 37.4         | -4.314(2)    | 3.332(4)     | x, 1+y, z       |
| Cg(2)···Cg(3)      | 4.9849(9)  | 34.8(3)      | 18.7        | 52.6         | 3.030(2)     | -4.721(2)    | x, y, z         |
| Cg(2)···Cg(3)      | 5.6657(10) | 34.8(3)      | 33.6        | 57.7         | -3.030(2)    | 4.721(2)     | x, 1+y, 1+z     |
| Cg(2)···Cg(4)      | 4.9849(9)  | 34.8(3)      | 18.7        | 52.6         | 3.030(2)     | -4.721(2)    | -1+x, y, z      |
| Cg(2)···Cg(4)      | 5.6657(10) | 34.8(3)      | 33.6        | 57.7         | -3.030(2)    | 4.721(2)     | -1+x, 1+y, 1+z  |
| Cg(2)···Cg(5)      | 5.431(4)   | 82.4(3)      | 52.2        | 37.4         | 4.314(2)     | -3.332(4)    | -1+x, 1+y, 1+z  |
| Cg(2)···Cg(5)      | 5.799(4)   | 82.4(3)      | 54.9        | 70.6         | 1.930(2)     | 3.332(4)     | -1+x, 1+y, z    |
| Cg(3)···Cg(1)      | 4.9849(9)  | 34.8(3)      | 52.6        | 18.7         | 4.721(2)     | -3.030(2)    | x, -1+y, -1+z   |
| Cg(3)···Cg(1)      | 5.6657(10) | 34.8(3)      | 57.7        | 33.6         | -4.721(2)    | 3.030(2)     | x, y, z         |
| Cg(3)···Cg(2)      | 5.6657(10) | 34.8(3)      | 57.7        | 33.6         | -4.721(2)    | -3.030(2)    | x, -1+y, -1+z   |
| Cg(3)···Cg(2)      | 4.9849(9)  | 34.8(3)      | 52.6        | 18.7         | -4.721(2)    | 3.030(2)     | x, y, z         |
| Cg(4)···Cg(1)      | 4.9849(9)  | 34.8(3)      | 52.6        | 18.7         | 4.721(2)     | -3.030(2)    | 1+x, -1+y, -1+z |
| Cg(4)···Cg(1)      | 5.6658(10) | 34.8(3)      | 57.7        | 33.6         | -4.721(2)    | 3.030(2)     | 1+x, y, z       |



Table S5 Continued...

|                                   |                |               |              |                  |                |                |                 |
|-----------------------------------|----------------|---------------|--------------|------------------|----------------|----------------|-----------------|
| Cg(4)⋯Cg(1)                       | 5.6657(10)     | 34.8(3)       | 57.7         | 33.6             | 4.721(2)       | -3.030(2)      | 2+x, -1+y, -1+z |
| Cg(4)⋯Cg(1)                       | 4.9850(9)      | 34.8(3)       | 52.6         | 18.7             | -4.721(2)      | 3.030(2)       | 2+x, y, z       |
| Cg(4)⋯Cg(1)                       | 4.9849(9)      | 34.8(3)       | 52.6         | 18.7             | -4.721(2)      | -3.030(2)      | -x, 1-y, -z     |
| Cg(4)⋯Cg(1)                       | 5.6658(10)     | 34.8(3)       | 57.7         | 33.6             | 4.721(2)       | 3.030(2)       | -x, 2-y, 1-z    |
| Cg(4)⋯Cg(2)                       | 4.9849(9)      | 34.8(3)       | 52.6         | 18.7             | 4.721(2)       | -3.030(2)      | x, -1+y, -1+z   |
| Cg(4)⋯Cg(2)                       | 5.6658(10)     | 34.8(3)       | 57.7         | 33.6             | -4.721(2)      | 3.030(2)       | x, y, z         |
| Cg(5)⋯Cg(1)                       | 5.431(4)       | 82.4(3)       | 37.4         | 52.2             | 3.332(4)       | -4.314(2)      | x, -1+y, z      |
| Cg(5)⋯Cg(1)                       | 5.431(4)       | 82.4(3)       | 37.4         | 52.2             | -3.332(4)      | 4.314(2)       | 2+x, y, z       |
| Cg(5)⋯Cg(2)                       | 5.431(4)       | 82.4(3)       | 37.4         | 52.2             | 3.332(4)       | -4.314(2)      | -1+x, -1+y, z   |
| Cg(5)⋯Cg(2)                       | 5.431(4)       | 82.4(3)       | 37.4         | 52.2             | -3.332(4)      | 4.314(2)       | 1+x, y, z       |
| Cg(5)⋯Cg(3)                       | 5.309(4)       | 72.2(3)       | 46.7         | 74.4             | 1.428(4)       | -3.638(2)      | x, y, 1+z       |
| Cg(5)⋯Cg(3)                       | 5.309(4)       | 72.2(3)       | 46.7         | 74.4             | -1.428(4)      | 3.638(2)       | 1+x, y, z       |
| Cg(5)⋯Cg(4)                       | 5.309(4)       | 72.2(3)       | 46.7         | 74.4             | 1.428(4)       | -3.638(2)      | -1+x, y, 1+z    |
| Cg(5)⋯Cg(4)                       | 5.309(4)       | 72.2(3)       | 46.7         | 74.4             | -1.428(4)      | 3.638(2)       | x, y, z         |
| Cg(5)⋯Cg(5)                       | 3.358(4)       | 0.0(3)        | 21.6         | 21.6             | -3.122(3)      | -3.122(3)      | -x, 1-y, 1-z    |
| Cg(5)⋯Cg(5)                       | 3.358(4)       | 0.0(3)        | 21.6         | 21.6             | 3.122(3)       | 3.122(3)       | 2-x, 1-y, 1-z   |
| <b>Y-X(I)⋯Cg(J)</b>               | <b>X⋯Cg(J)</b> | <b>X-Perp</b> | <b>γ (°)</b> | <b>Y-X⋯Cg(J)</b> | <b>Y⋯Cg(J)</b> | <b>Y-X, Pi</b> | <b>Symmetry</b> |
| <b>compound 1</b>                 |                |               |              |                  |                |                |                 |
| C1-O2⋯Cg(2)                       | 3.275(3)       | 3.240         | 8.36         | 127.77(19)       | 4.162(5)       | 32.04          | x, y, z         |
| C1-O2⋯Cg(2)                       | 3.275(3)       | -3.240        | 8.36         | 127.77(19)       | 4.162(5)       | 32.04          | 1-x, 1-y, 1-z   |
| C10-O7⋯Cg(1)                      | 3.310(3)       | 3.234         | 12.31        | 124.2(2)         | 4.140(5)       | 25.88          | -1+x, y, z      |
| C10-O7⋯Cg(1)                      | 3.310(3)       | -3.234        | 12.31        | 124.2(2)         | 4.140(5)       | 25.88          | 1-x, 1-y, 1-z   |
| <b>compound 1'</b>                |                |               |              |                  |                |                |                 |
| <b>No short ring-interactions</b> |                |               |              |                  |                |                |                 |
| <b>compound 2</b>                 |                |               |              |                  |                |                |                 |
| O5W-H5WB⋯Cg(3)                    | 2.92(12)       | 2.56          | 28.75        | 61(7)            | 2.625(8)       | 37             | x, y, z         |
| O5W-H5WB⋯Cg(3)                    | 2.92(12)       | -2.56         | 28.75        | 61(7)            | 2.625(8)       | 37             | -x, 1-y, -z     |
| O5W-H5WB⋯Cg(4)                    | 2.92(12)       | 2.56          | 28.75        | 61(7)            | 2.625(8)       | 37             | -1+x, y, z      |
| O5W-H5WB⋯Cg(4)                    | 2.92(12)       | -2.56         | 28.75        | 61(7)            | 2.625(8)       | 37             | 1-x, 1-y, -z    |

<sup>a</sup>Note: The slippage (= distance between Cg(I) and perpendicular projection of Cg(J) on Ring I (Å)) does not exist for **1** while it is 3.204 and 1.236 for **1'** and **2**, respectively. Cg(I)⋯Cg(J) = distance between ring centroids (Å); Cg(I) = plane number I (= ring number in () above); α = dihedral angle between planes I and J (°); β = angle Cg(I)-Cg(J) or Cg(I)-Me vector and normal to plane I (°); γ = angle Cg(I)-Cg(J) vector and normal to plane J (°); CgI\_Perp = perpendicular distance of Cg(I) on ring J (Å) and CgJ\_Perp = perpendicular distance of Cg(J) on ring I (Å); Cg(J) = centre of gravity of ring J (plane number above); X⋯Cg(J) = distance of X to Cg (Å); X-Perp = perpendicular distance of X to ring plane J (Å); γ = angle between Cg-X vector and ring J normal (°); Y-X⋯Cg(J) = Y-X-Cg(J) angle (°); Y⋯Cg(J) = distance of Y to Cg (Å); Y-X, Pi = angle of the Y-X bond with the π-plane (*i.e.*' perpendicular = 90°, parallel = 0°).

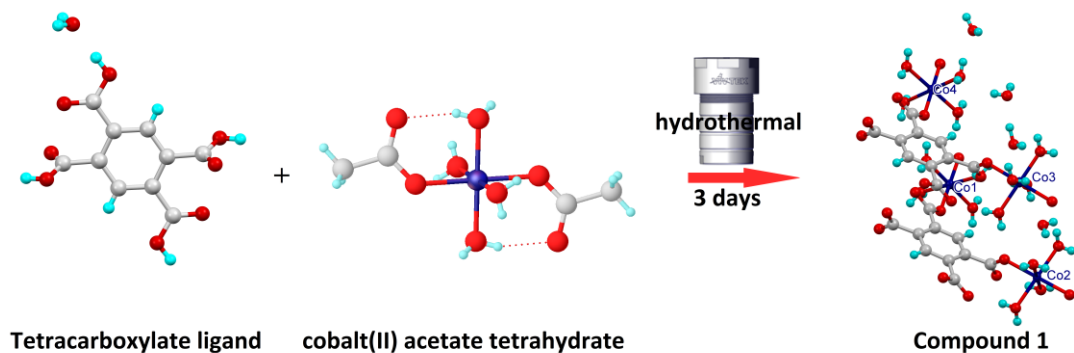

**Scheme S1** Hydrothermal synthesis of compound **1** with 63% yield.

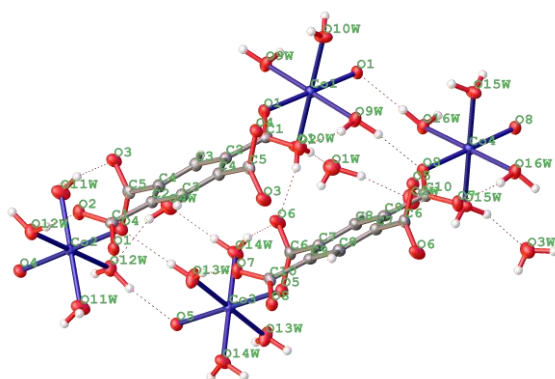

**Fig. S1 (a)** Ortep view and atom numbering scheme with displacement ellipsoids drawn at 50% probability level for compound **1**.

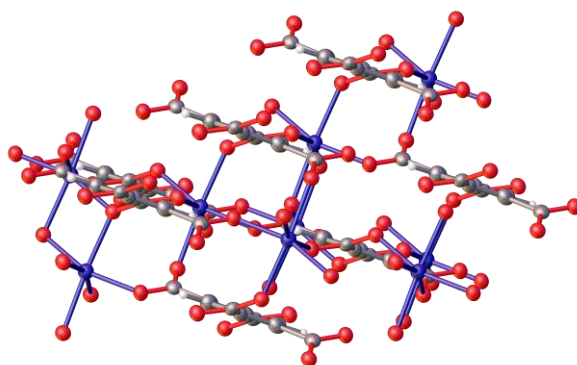

**Fig. S1 (b)** Repeating structural motifs showing dimers consisting of two edge-sharing symmetry-related cobaltous ions in compound **1**'.

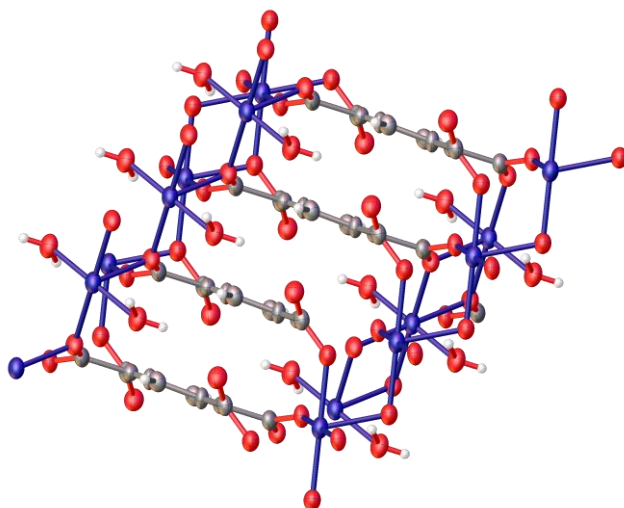

**Fig. S1 (c)** A depiction illustrating a six-coordinated Co1 octahedron surrounded by carboxylate oxygen atoms and water molecules in compound **2**.

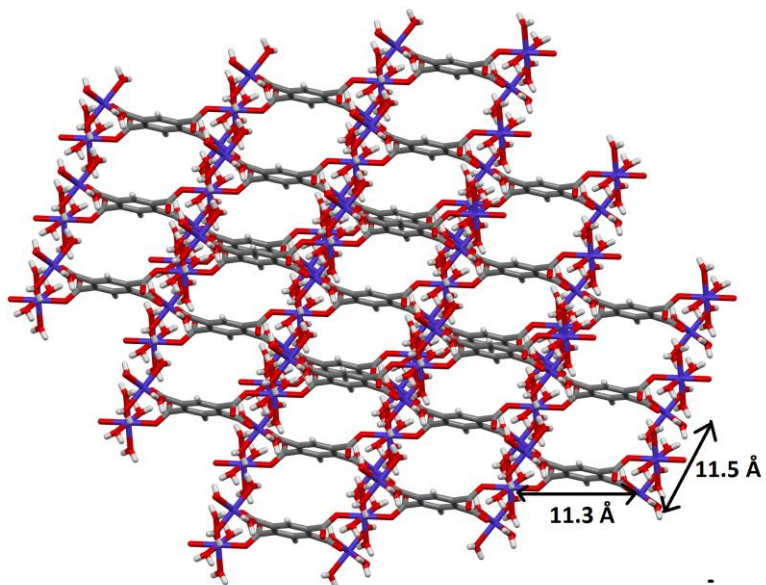

**Fig. S2 (a)** A 1D intersecting channel system illustrating a narrow open window with approx. 11.5 Å × 11.3 Å dimensions in the polymeric structure of network **1**.

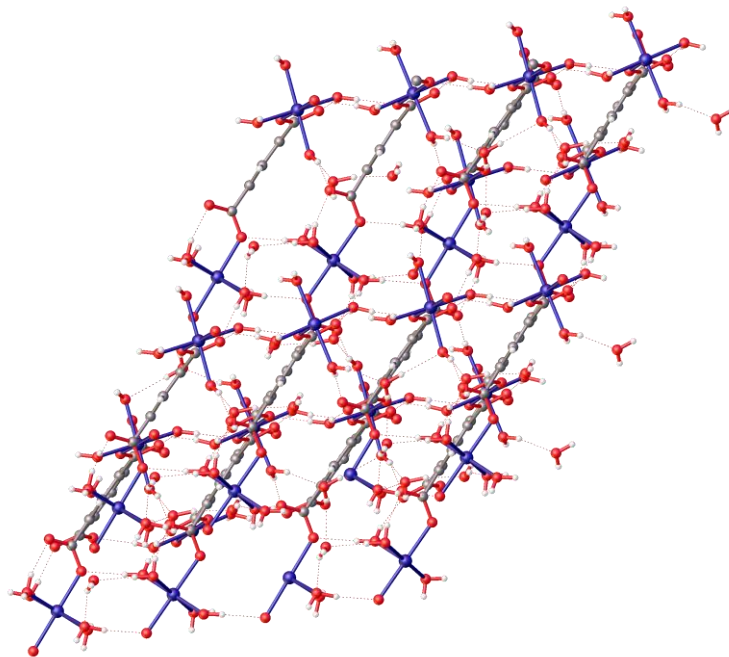

**Fig. S2 (b)** A 3D supramolecular framework of **1** showing extensive O–H···O hydrogen bond interactions primarily generated by water molecules.

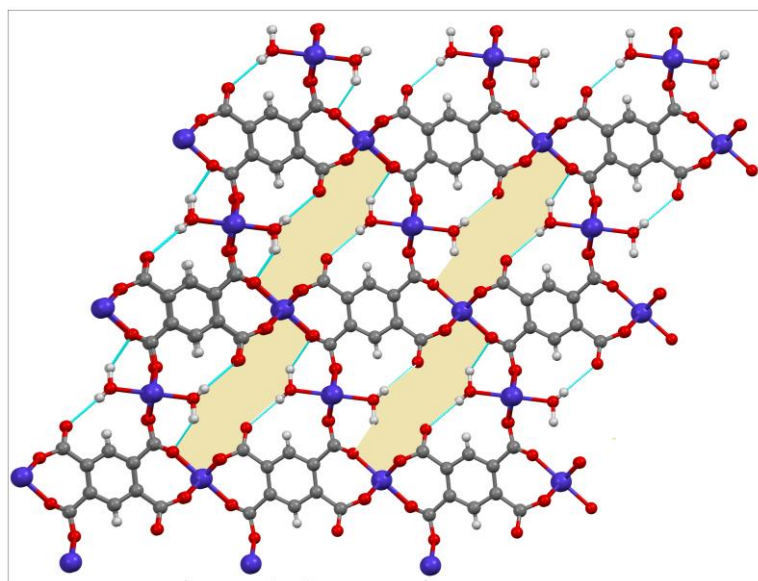

**Fig. S2 (c)** A 3D supramolecular network of **2** displaying O–H···O hydrogen bond interactions mainly manifested by water molecules.

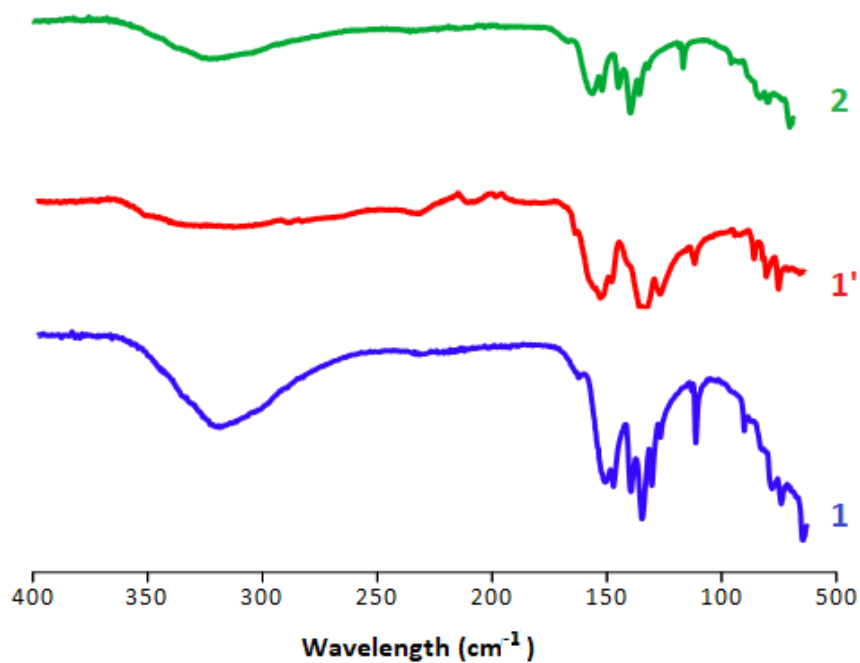

Fig. S3 Infrared (IR) spectra for compounds 1, 1' and 2.

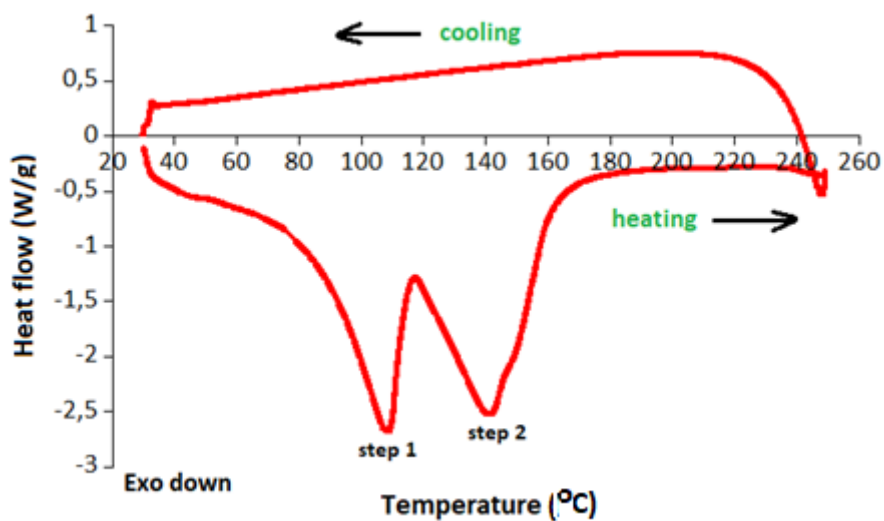

Fig. S4 Single-cycle heat-cool differential scanning calorimetry (DSC) profile for 1 (step 1: onset dehydration is 109.3 °C and, step 2: onset phase transition is 142.4 °C).

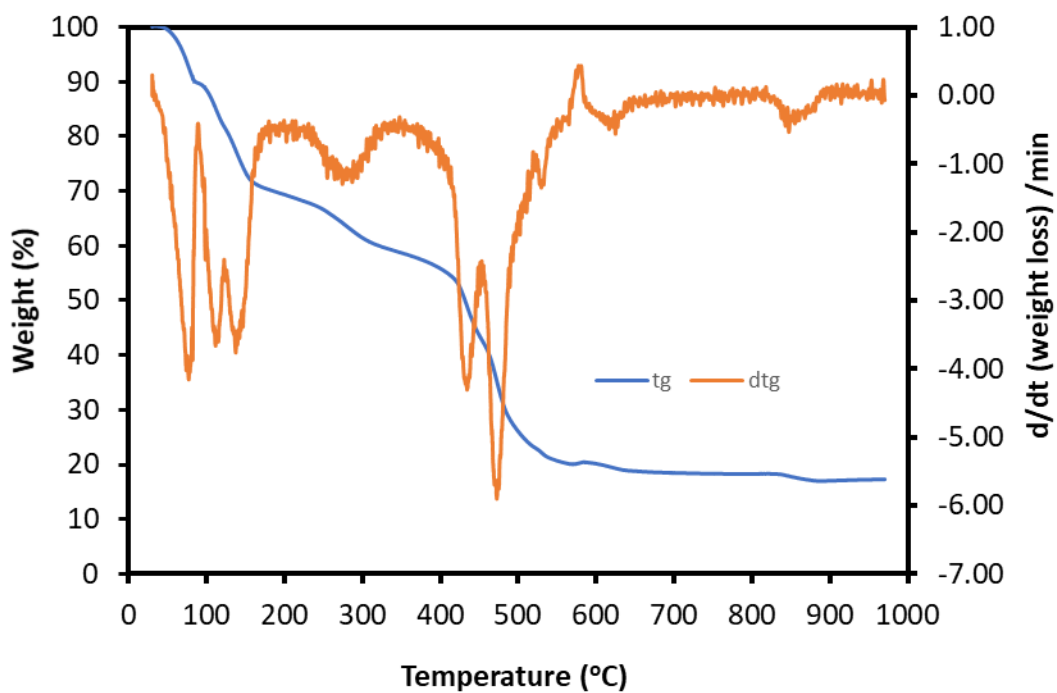

Fig. S5 (a) Thermogravimetric (tg; blue thermogram) plot and its derivative (dtg; red curve) for compound 1.

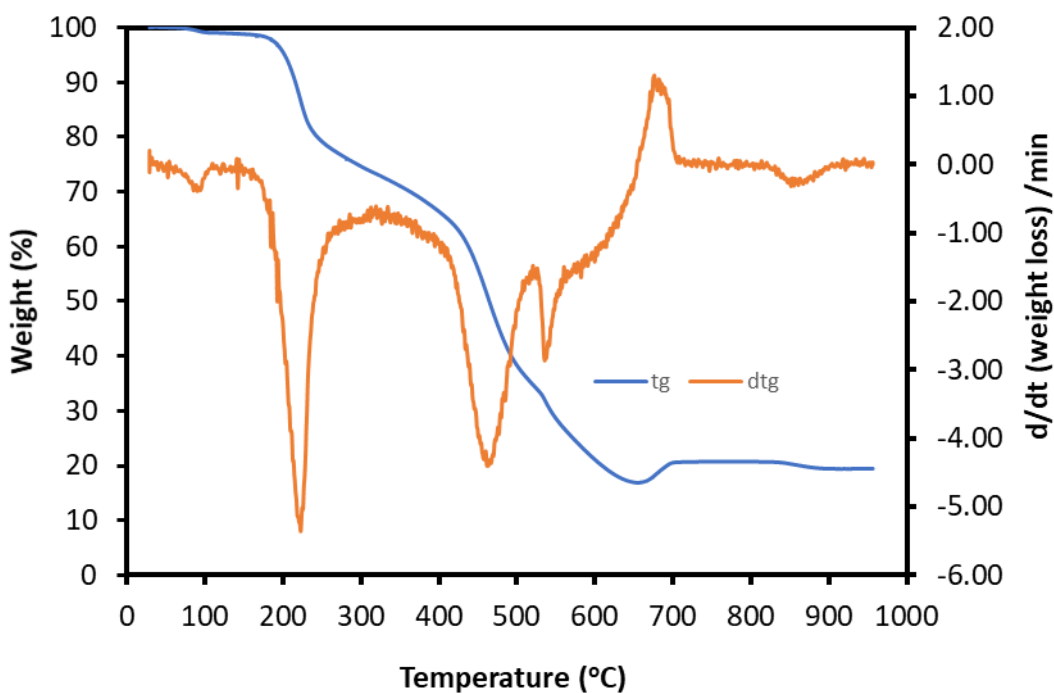

Fig. S5 (b) Thermogravimetric (tg; blue thermogram) plot and its derivative (dtg; red curve) for compound 1'.

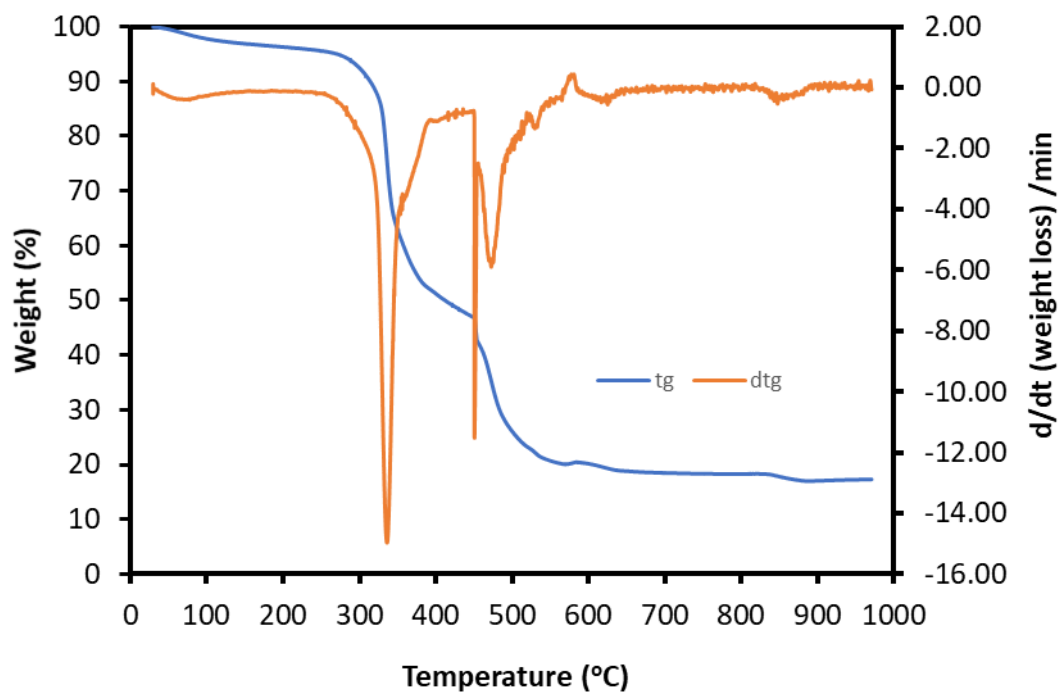

Fig. S5 (c) Thermogravimetric (tg; blue thermogram) plot and its derivative (dtg; red curve) for compound 2.

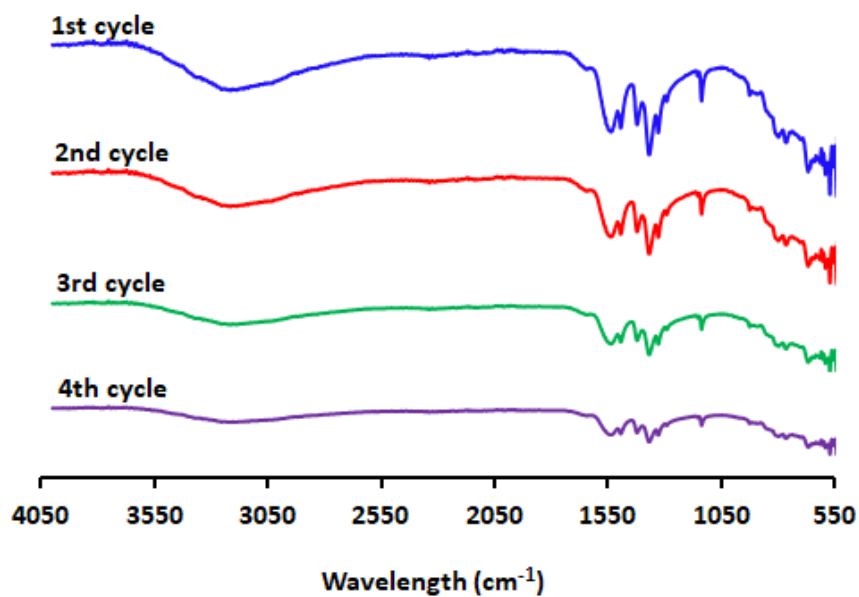

Fig. S6 Infrared spectra of catalyst 2 after the first (blue), second (red), third (green), and fourth (purple) recycled runs.

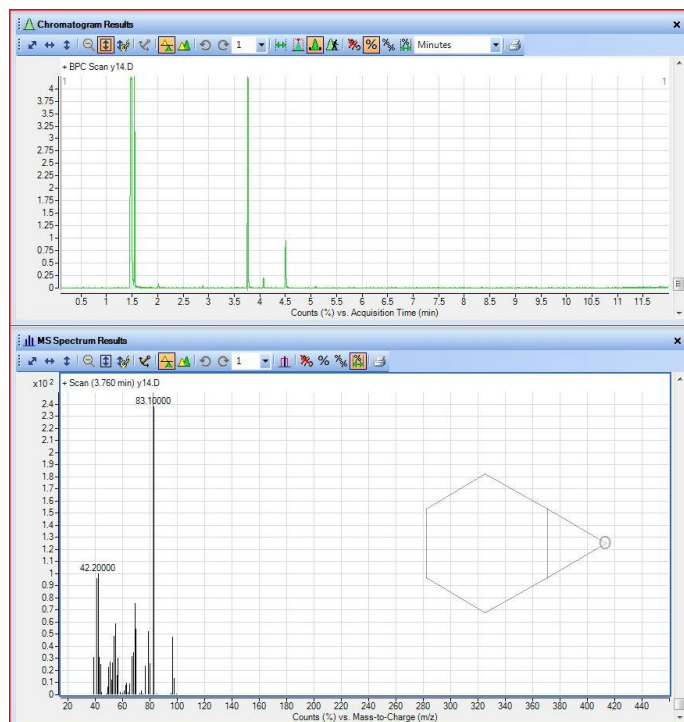

**Fig. S7 (a)** GC-MS spectrum for the selective oxidation of cyclohexene to cyclohexene epoxide utilizing O<sub>2</sub> over catalyst **2** for 20 h.

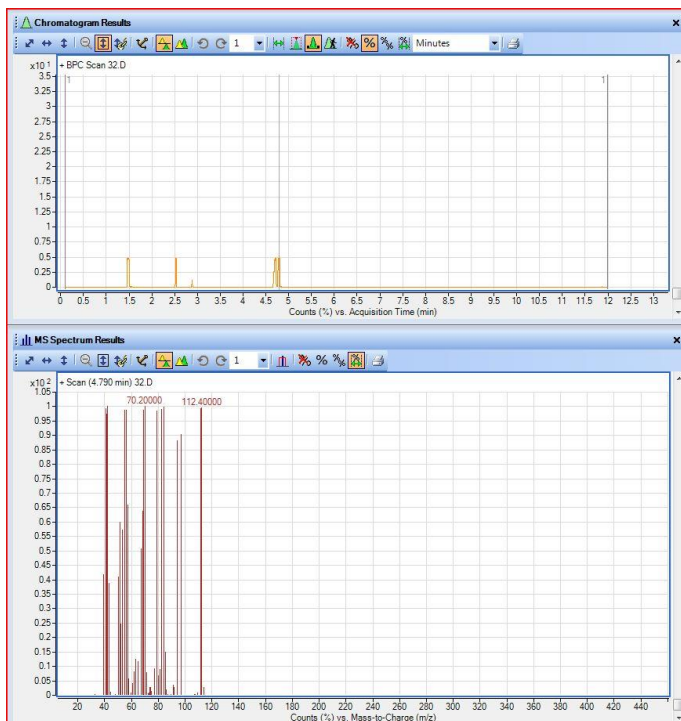

**Fig. S7 (b)** GC-MS spectrum for the selective oxidation of 3-methylcyclohexene to 3-methylcyclohexene epoxide utilizing O<sub>2</sub> over catalyst **2** for 20 h.



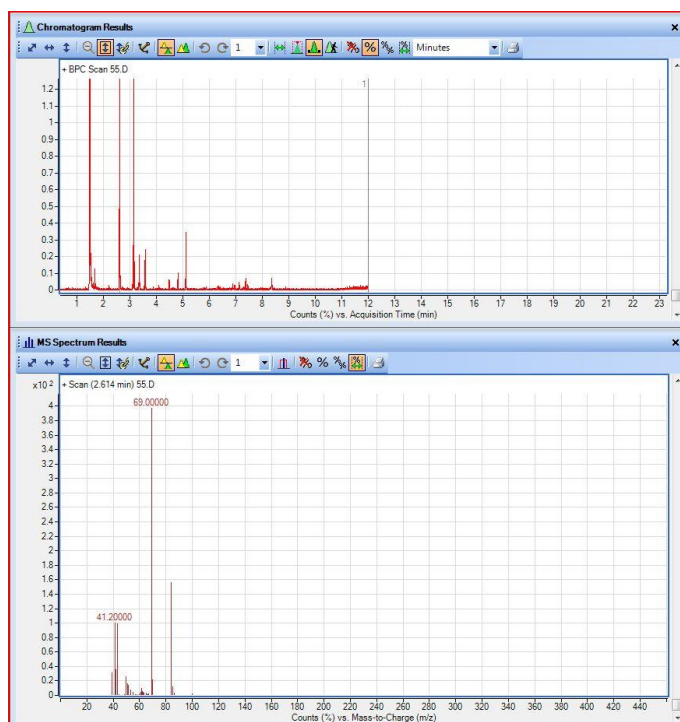

**Fig. S7 (c)** GC-MS spectrum for the selective oxidation of cyclopentene to cyclopentene epoxide utilizing O<sub>2</sub> over catalyst **2** for 20 h.

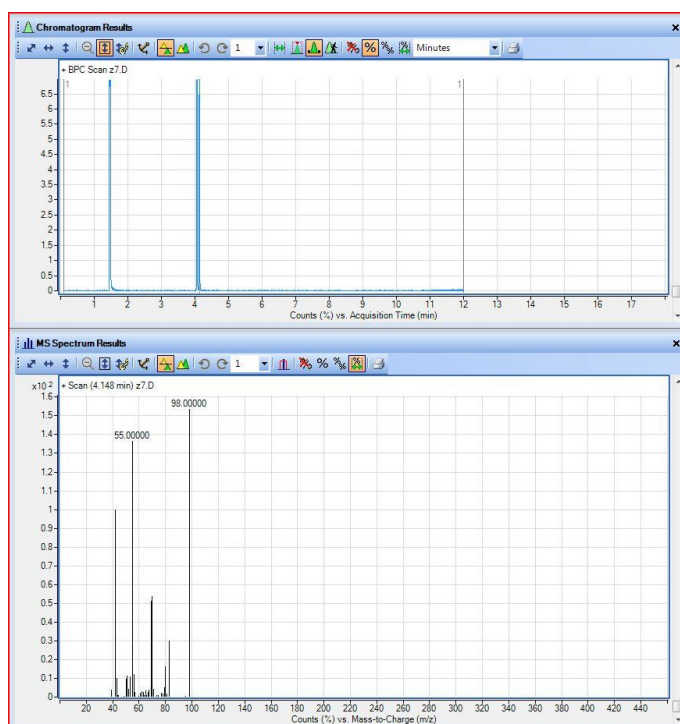

**Fig. S7 (d)** GC-MS spectrum for the selective oxidation of 3-methylcyclopentene to 3-methylcyclopentene epoxide utilizing O<sub>2</sub> over catalyst **2** for 20 h.

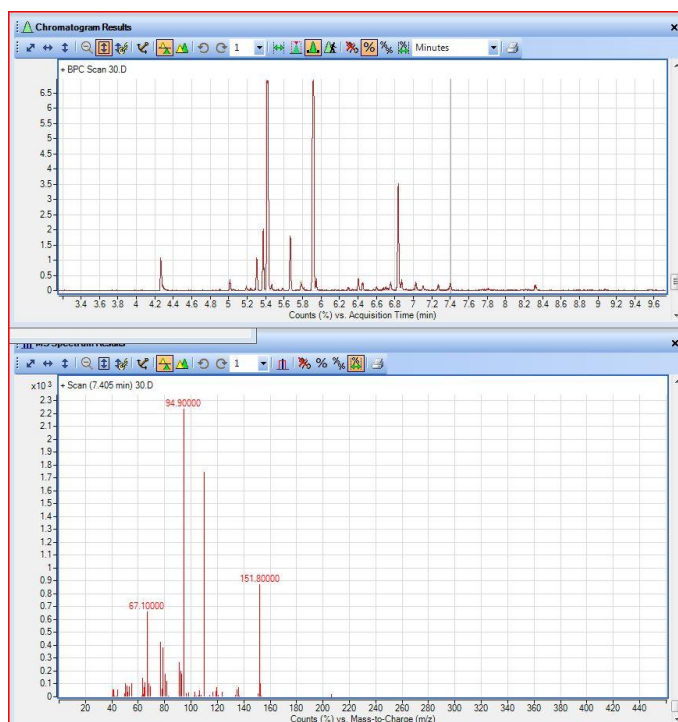

**Fig. S7 (e)** GC-MS spectrum for the selective oxidation of limonene to limonene-1,2-epoxide utilizing O<sub>2</sub> over catalyst **2** for 20 h.

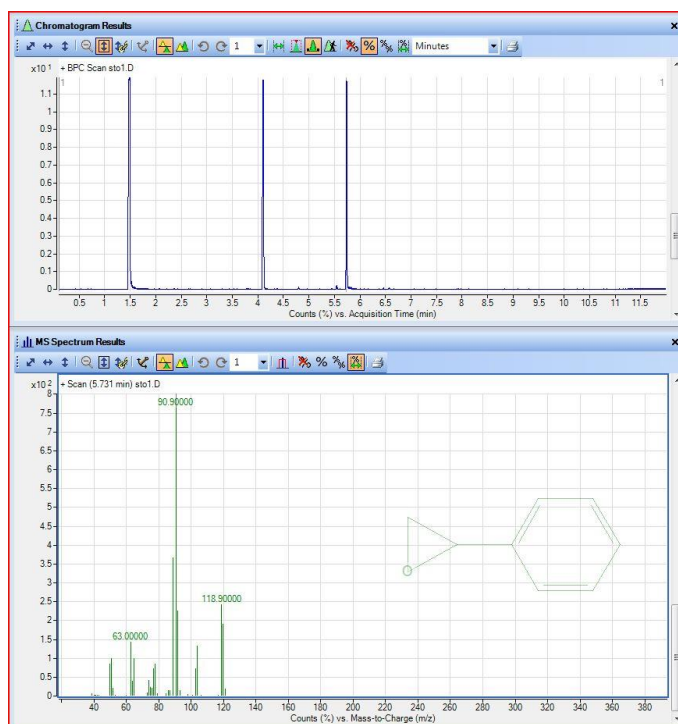

**Fig. S7 (f)** GC-MS spectrum for the selective oxidation of styrene to styrene epoxide utilizing O<sub>2</sub> over catalyst **2** for 20 h.

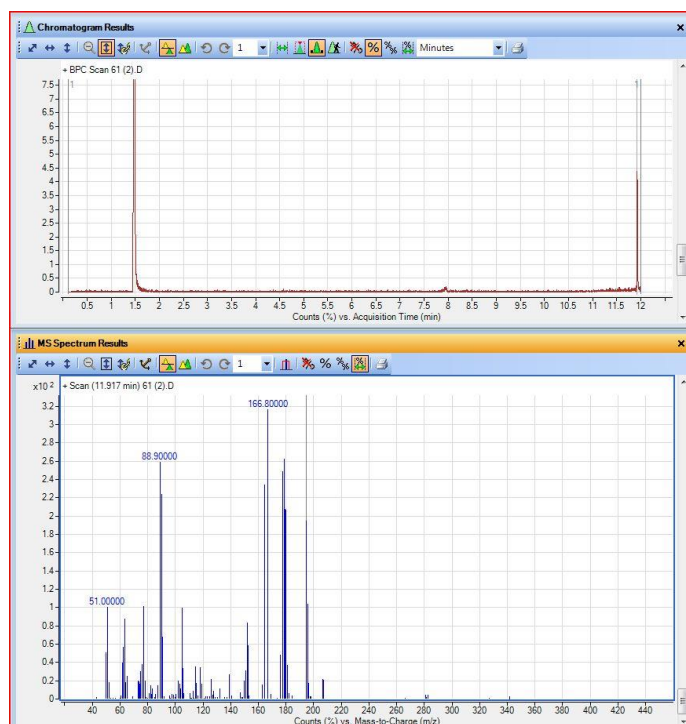

**Fig. S7 (g)** GC-MS spectrum for the selective oxidation of *trans*-stilbene to *trans*-stilbene epoxide utilizing O<sub>2</sub> over catalyst **2** for 20 h.

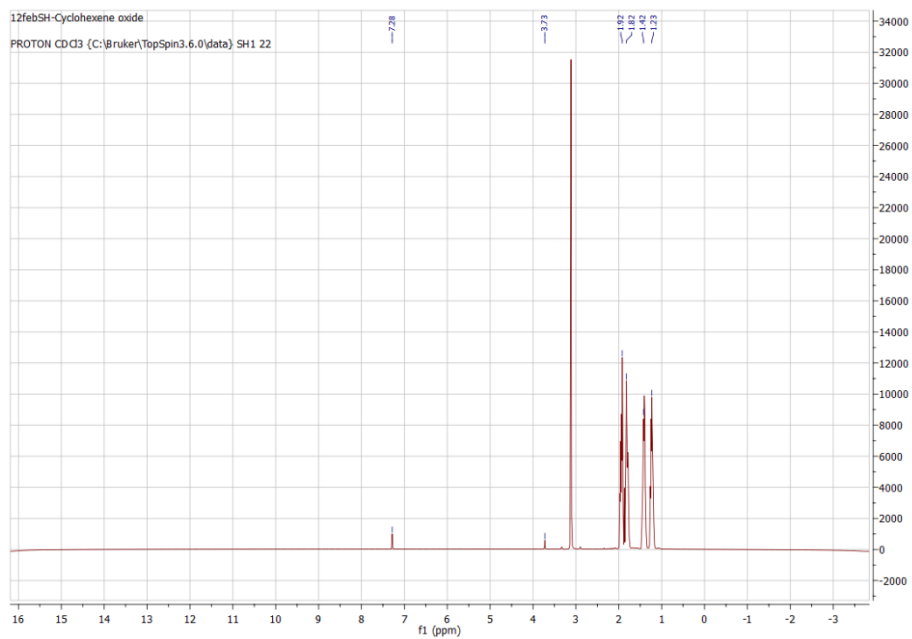

**Fig. S8 (a)**  $^1\text{H}$  NMR spectra (in  $\text{CDCl}_3$ ) for cyclohexene epoxide.

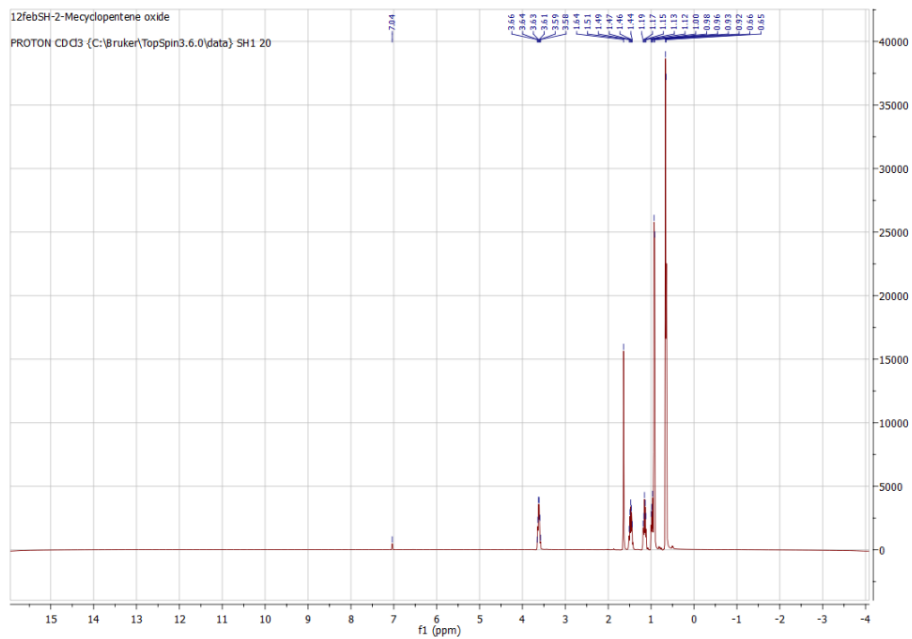

**Fig. S8 (b)**  $^1\text{H}$  NMR spectra (in  $\text{CDCl}_3$ ) for 3-methylcyclohexene epoxide.

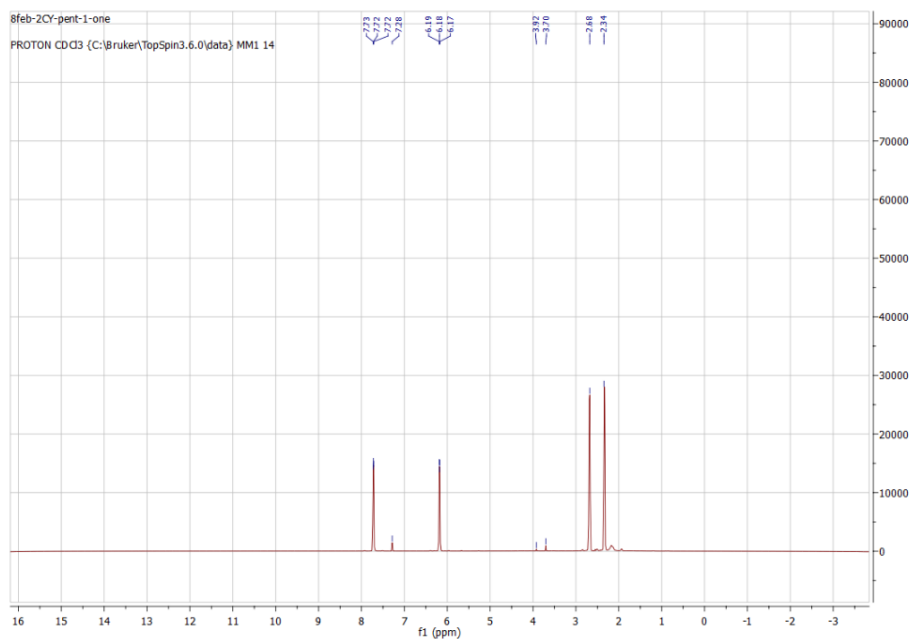

**Fig. S8 (c)**  $^1\text{H}$  NMR spectra (in  $\text{CDCl}_3$ ) for cyclopentene epoxide.

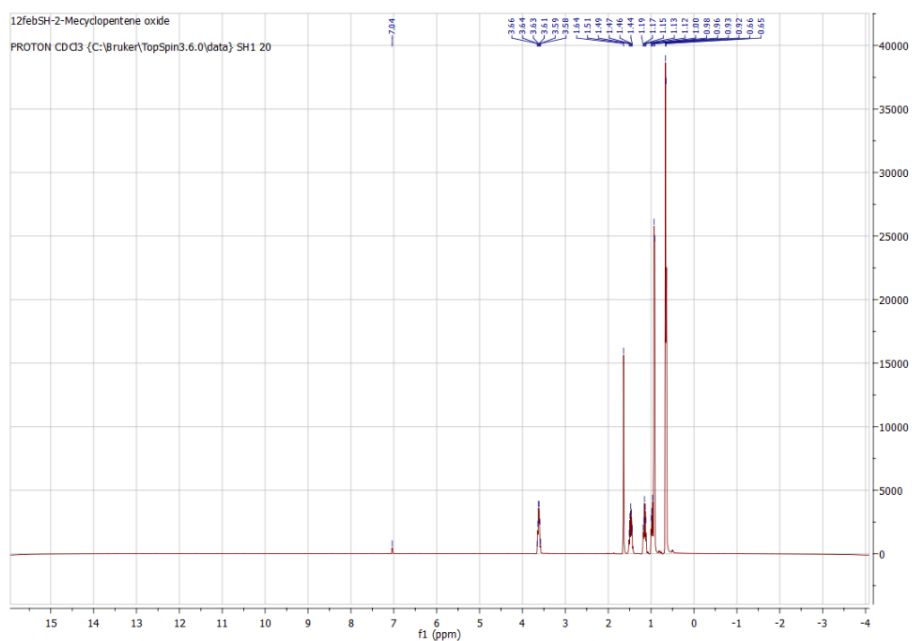

**Fig. S8 (d)**  $^1\text{H}$  NMR spectra (in  $\text{CDCl}_3$ ) for 3-methylcyclopentene epoxide.

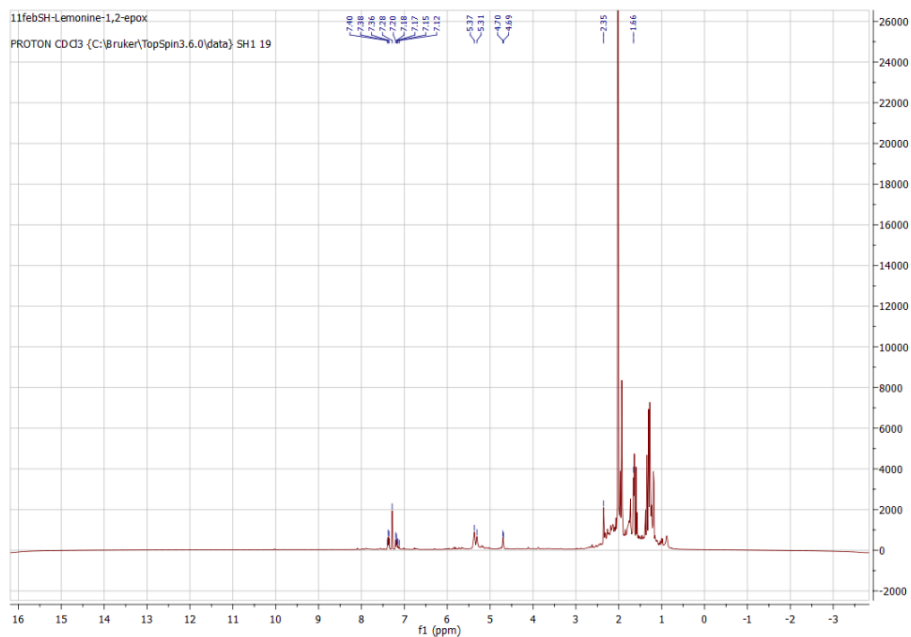

**Fig. S8 (e)**  $^1\text{H}$  NMR spectra (in  $\text{CDCl}_3$ ) for limonene-1,2-epoxide.

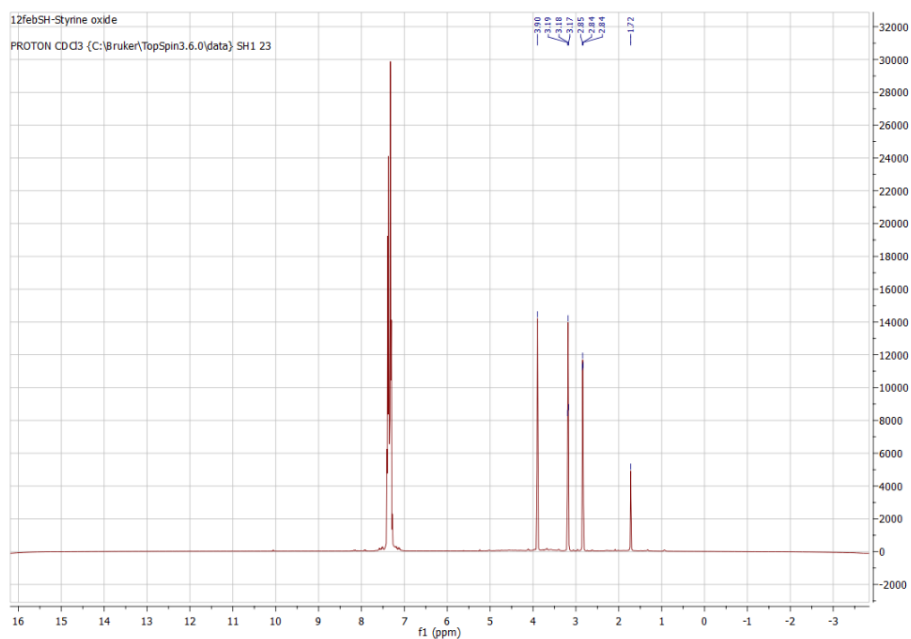

**Fig. S8 (f)**  $^1\text{H}$  NMR spectra (in  $\text{CDCl}_3$ ) for styrene epoxide.

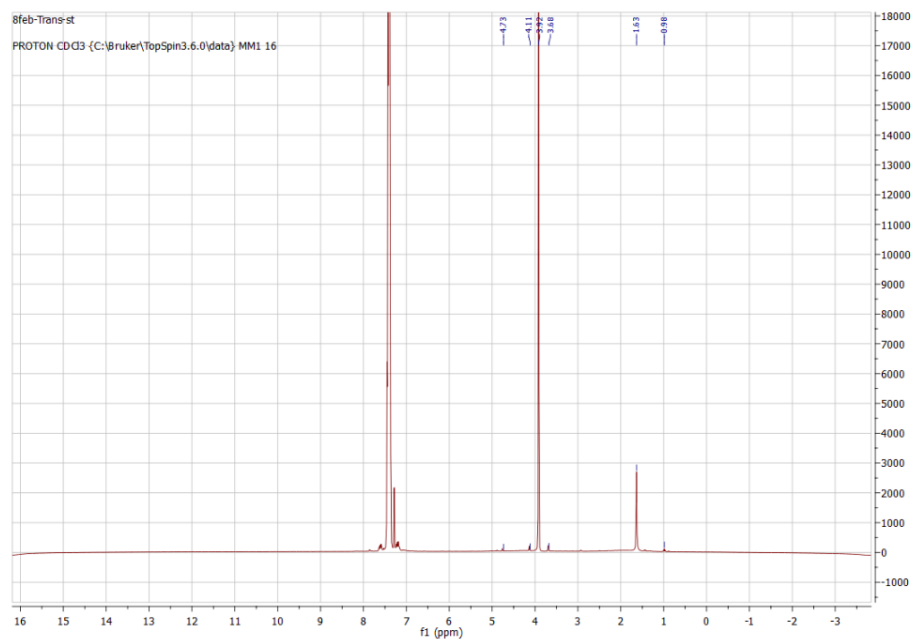

**Fig. S8 (g)**  $^1\text{H}$  NMR spectra (in  $\text{CDCl}_3$ ) for *trans*-stilbene epoxide.
